# Supplementary material for: Postoperative outcomes of kidney stone surgery in patients with spinal cord injury: a systematic review and meta-analysis
Source: Research Square preprint supplement (doi:10.21203/rs.3.rs-1988162/v1), 2022-08-26
Supplement: Supplementary file 1 [file 0bd35f922fd34ada118984e8.docx]

Supplemental Table S2. Stone free rate and complications in patients with spinal cord injury following surgical intervention for kidney stones

|  |  |  |  | Complications | | | | | |
| --- | --- | --- | --- | --- | --- | --- | --- | --- | --- |
|  |  |  |  | Minor complications | |  | Major complications | | |
| Intervention | Study | Stone free rate |  | Type I | Type II |  | Type III | Type IV | Type V |
| SWL | Lazare et al. (1988)11 | 19/26 (73.1%) |  | NR | NR |  | NR | 1/46 (2.2%) | NR |
|  | Wahle et al. (1988)13 | 13/42 (31.0%) |  | 12/54 (22.2%) | NR |  | NR | NR | NR |
|  | Spirnak et al. (1988)12 | 6/10 (60.0%) |  | NR | NR |  | NR | NR | NR |
|  | Irwin et al. (1991)15 | 0/1 (0%) |  | 1/1 (100%) | NR |  | NR | NR | NR |
|  | Niedrach et al. (1991)16 | 4/9 (44.4%) |  | 2/11 (18.2%) | NR |  | NR | NR | NR |
|  | Deliveliotis et al. (1994)17 | 10/15 (66.7%) |  | 18/15 (100%) | 3/15 (20.0%) |  | NR | 2/15 (13.3%) | NR |
|  | Robert et al. (1995)18 | 8/15 (53.3%) |  | NR | NR |  | NR | NR | NR |
|  | Donnellan et al. (1999)36 | 14/21 (66.6%) |  | NR | NR |  | NR | NR | NR |
|  | Chen et al. (2002)19 | 5/7 (71.4%) |  | NR | NR |  | NR | NR | NR |
|  | Clifton et al. (2014)27 | NR |  | 1/26 (3.8%) | 0/26 (0%) |  | 1/26 (3.8%) | 1/26 (3.8%) | NR |
|  | Total | 79/146 (54.1%) |  | 34/107 (31.8%) | 3/41 (7.3%) |  | 1/26 (3.8%) | 4/87 (4.6%) | NA |
|  |  |  |  |  |  |  |  |  |  |
| PCNL | Culkin et al. (1986)10 | 15/28 (53.6%) |  | 21/47 (44.7%) | 9/47 (19.1%) |  | 9/47 (19.1%) | 1/47 (2.1%) | 0/47 (0%) |
|  | Culkin et al. (1990)14 | 131/148 (88.6%) |  | 27/35 (77.1%) | 18/35 (51.4%) |  | 4/35 (11.4%) | 2/35 (5.7%) |  |
|  | Irwin et al. (1991)15 | 7/10 (10.0%) |  | 11/10 (100%) | 1/10 (10.0%) |  | NR | NR | 0/10 (0%) |
|  | Donnellan et al. (1999)36 | 64/76 (84.2%) |  | NR | NR |  | NR | NR | NR |
|  | Chen et al. (2002)19 | 14/14 (100%) |  | NR | NR |  | NR | NR | NR |
|  | Rubenstein et al. (2004)20 | 45/47 (95.7%) |  | 13/23 (56.5%) | 2/23 (8.7%) |  | 4/23 (17.4%) | 1/23 (4.3%) | NR |
|  | Lawrentschuk et al. (2005)21 | 37/44 (84.1%) |  | 28/54 (51.9%) | 3/54 (5.6%) |  | 2/54 (3.7%) | 1/54 (1.9%) | 0/54 (0%) |
|  | Symons et al. (2006)22 | 19/32 (59.4%) |  | 7/39 (17.9%) | NR |  | 2/39 (5.1%) | NR | 3/39 (7.7%) |
|  | Knox et al. (2012)23 | 40/66 (60.6%) |  | 14/47 (29.8%) | 9/47 (19.1%) |  | 3/47 (6.4%) | 14/47 (29.8%) | 1/47 (2.1%) |
|  | Nabbout et al. (2012)24 | 14/26 (53.8%) |  | 1/21 (4.8%) | 6/21 (28.6%) |  | 2/21 (9.5%) | 3/21 (14.3%) | 0/21 (0%) |
|  | Alsinnawi et al. (2013)25 | 3/5 (60.0%) |  | 5/5 (100%) | 2/5 (40.0%) |  | NR | NR | NR |
|  | Clifton et al. (2014)27 | NR |  | 1/40 (2.5%) | 2/40 (5.0%) |  | 1/40 (2.5%) | 2/40 (5.0%) | NR |
|  | Danawala et al. (2015)28 | 25/31 (80.6%) |  | 26/52 (50.0%) | 16/52 (30.8%) |  | 9/52 (17.3%) | 5/52 (9.6%) | 0/52 (0%) |
|  | Sofimajidpour et al. (2016)30 | 17/32 (53.1%) |  | 11.32 (34.4%) | 7/32 (21.8%) |  | 2/32 (6.3%) | 6/32 (18.8%) | 0/32 (0%) |
|  | Baldea et al. (2017)31 | NR |  | NR | 96/1885 (5.1%) |  | NR | 194/1885 (10.3%) | 809/1885 (4.2%) |
|  | Chaudhry et al. (2017)32 | 9/15 (60.0%) |  | NR | 1/15 (6.7%) |  | NR | 4/15 (26.7%) | NR |
|  | Torricelli et al. (2020)35 | 19/39 (48.7%) |  | 2/39 (5.1%) | 7/39 (17.9%) |  | 0/39 (0%) | 0/39 (0%) | 0/39 (0%) |
|  | Total | 549/613 (74.9%) |  | 167/444 (37.6%) | 179/2305 (7.8%) |  | 38/429 (8.9%) | 151/2290 (6.6%) | 85/2261 (3.8%) |
|  |  |  |  |  |  |  |  |  |  |
| Ureteroscopy | Donnellan et al. (1999)36 | 7/9 (77.8%) |  | NR | NR |  | NR | NR | NR |
|  | Chen et al. (2002)19 | 1/1 (100%) |  | NR | NR |  | NR | NR | NR |
|  | Wolfe et al. (2013)26 | 23/67 (34.3%) |  | 4/67 (6.0%) | 2/67(3.0%) |  | 1/67 (1.5%) | 15/67 (22.4%) | 1/67 (1.5%) |
|  | Clifton et al. (2014)27 | NR |  | 1/27 (3.6%) | 0/28 (0%) |  | 3/28 (10.7%) | 2/28 (7.1%) | NR |
|  | Tepeler et al. (2015)29 | 12/21 (57.1%) |  | 2/27 (7.4%) | 1/27 (3.7%) |  | NR | 3/27 (11.1%) | NR |
|  | Morhardt et al. (2018)33 | 29/79 (36.7%) |  | 3/95 (3.2%) | 14/95 (14.7%) |  | 1/95 (1.1%) | 2/95 (2.1%) | NR |
|  | Prattley et al. (2019)34 | 22/41 (53.7%) |  | NR | 10/41 (24.4%) |  | 2/41 (4.9%) | 33/41 (7.3%) | NR |
|  | Total | 94/218 (43.1%) |  | 9/217 (4.1%) | 27/258 (10.5%) |  | 5/164 (3.0%) | 25/258 (9.7%) | 1/67 (1.5%) |

SWL = shockwave lithotripsy; PCNL = percutaneous nephrolithotomy; NR = not recorded; NA = not applicable. Stone free rate was defined as the rate of procedures resulting in stone free status divided by the total number of procedures. Complication rate was defined as the rate of procedures resulting in complications, categorized by Clavien-Dindo classification. In some studies, in which a single procedure resulted in multiple complications of a certain classification, the numerator (number of procedures resulting in complications) was greater than the denominator (total number of procedures); in these cases, the complication rate was reported as 100%.
