# Supplementary material for: Postoperative outcomes of kidney stone surgery in patients with spinal cord injury: a systematic review and meta-analysis
Source: Research Square preprint supplement (doi:10.21203/rs.3.rs-1988162/v1), 2022-08-26
Supplement: Supplementary file 2 [file d44e23151a0392a27672cabc.docx]

Supplemental Table S1. Risk of bias assessment for included studies using the Methodological Index for Non-Randomized Studies (MINORS) tool

|  |  |  |  |  |  |  |  |  | Additional criteria for comparative studies | | | |  |  |
| --- | --- | --- | --- | --- | --- | --- | --- | --- | --- | --- | --- | --- | --- | --- |
| Study | Clearly stated aim | Inclusion of consecutive patients | Prospective collection of data | Endpoints appropriate to aim of study | Unbiased assessment of study endpoint | Follow-up period appropriate to aim of study | Loss to follow up less than 5% | Prospective calculation of study size | Adequate control group | Contemporary groups | Baseline equivalence of groups | Adequate statistical analyses | Total score | Overall risk of bias |
| Culkin et al. (1986)10 | 2 | 2 | 0 | 2 | 0 | 0 | 0 | 0 | NA | NA | NA | NA | 6/16 | High |
| Lazare et al. (1988)11 | 2 | 2 | 0 | 2 | 0 | 1 | 2 | 0 | NA | NA | NA | NA | 9/16 | Moderate |
| Spirnak et al. (1988)12 | 2 | 2 | 0 | 1 | 0 | 1 | 2 | 0 | NA | NA | NA | NA | 8/16 | High |
| Wahle et al. (1988)13 | 2 | 2 | 0 | 2 | 0 | 2 | 2 | 0 | NA | NA | NA | NA | 10/16 | Moderate |
| Irwin et al. (1991)15 | 1 | 2 | 0 | 1 | 0 | 2 | 2 | 0 | NA | NA | NA | NA | 8/16 | High |
| Niedrach et al. (1991)16 | 1 | 2 | 0 | 1 | 0 | 2 | 2 | 0 | NA | NA | NA | NA | 8/16 | High |
| Deliveliotis et al. (1994)17 | 1 | 2 | 0 | 2 | 0 | 2 | 2 | 0 | NA | NA | NA | NA | 9/16 | Moderate |
| Robert et al. (1995)18 | 1 | 2 | 0 | 1 | 0 | 2 | 2 | 0 | NA | NA | NA | NA | 8/16 | High |
| Donnellan et al. (1999)36 | 2 | 2 | 0 | 2 | 0 | 2 | 2 | 0 | NA | NA | NA | NA | 10/16 | Moderate |
| Chen et al. (2002)19 | 2 | 2 | 0 | 2 | 0 | 2 | 2 | 0 | NA | NA | NA | NA | 10/16 | Moderate |
| Rubenstein et al. (2004)20 | 2 | 2 | 0 | 2 | 0 | 2 | 2 | 0 | NA | NA | NA | NA | 10/16 | Moderate |
| Lawrentschuk et al. (2005)21 | 2 | 2 | 2 | 2 | 0 | 1 | 2 | 0 | NA | NA | NA | NA | 11/16 | Moderate |
| Symons et al. (2006)22 | 2 | 2 | 0 | 2 | 0 | 2 | 1 | 0 | NA | NA | NA | NA | 9/16 | Moderate |
| Knox et al. (2012)23 | 2 | 2 | 0 | 2 | 0 | 1 | 2 | 0 | NA | NA | NA | NA | 9/16 | Moderate |
| Nabbout et al. (2012)24 | 2 | 2 | 0 | 2 | 0 | 1 | 2 | 0 | NA | NA | NA | NA | 9/16 | Moderate |
| Alsinnawi et al. (2013)25 | 2 | 2 | 0 | 2 | 0 | 2 | 2 | 0 | NA | NA | NA | NA | 10/16 | Moderate |
| Wolfe et al. (2013)26 | 2 | 2 | 0 | 2 | 0 | 2 | 2 | 0 | NA | NA | NA | NA | 10/16 | Moderate |
| Clifton et al. (2014)27 | 2 | 2 | 0 | 1 | 0 | 2 | 2 | 0 | NA | NA | NA | NA | 11/16 | Moderate |
| Tepeler et al. (2015)29 | 2 | 2 | 0 | 2 | 0 | 2 | 2 | 0 | NA | NA | NA | NA | 10/16 | Moderate |
| Sofimajidpour et al. (2016)30 | 2 | 2 | 0 | 2 | 0 | 2 | 2 | 0 | NA | NA | NA | NA | 10/16 | Moderate |
| Chaudhry et al. (2017)32 | 2 | 2 | 0 | 2 | 0 | 2 | 2 | 0 | NA | NA | NA | NA | 10/16 | Moderate |
| Morhardt et al. (2018)33 | 2 | 2 | 2 | 2 | 0 | 1 | 2 | 0 | NA | NA | NA | NA | 11/16 | Moderate |
| Prattley et al. (2019)34 | 2 | 2 | 0 | 2 | 0 | 2 | 2 | 0 | NA | NA | NA | NA | 10/16 | Moderate |
| Culkin et al. (1990)14 | 2 | 2 | 2 | 1 | 0 | 2 | 2 | 0 | 2 | 2 | 2 | 1 | 18/24 | Moderate |
| Danawala et al. (2015)28 | 2 | 2 | 0 | 2 | 0 | 2 | 2 | 0 | 2 | 2 | 0 | 1 | 16/24 | Moderate |
| Baldea et al. (2017)31 | 2 | 2 | 2 | 2 | 0 | 1 | 2 | 0 | 2 | 2 | 2 | 2 | 18/24 | Moderate |
| Torricelli et al. (2020)35 | 2 | 2 | 2 | 2 | 0 | 1 | 2 | 0 | 2 | 2 | 2 | 1 | 20/24 | Low |

NA = not applicable.
