# Supplementary material for: Postoperative outcomes of kidney stone surgery in patients with spinal cord injury: a systematic review and meta-analysis
Source: Research Square preprint supplement (doi:10.21203/rs.3.rs-1988162/v1), 2022-08-26
Supplement: Supplementary file 3 [file fca73b12f94f56645b303730.docx]

Supplemental Figure S1. Search strategy

Ovid MEDLINE:

1. Spinal cord diseases/ or Spinal cord injuries/ or spinal cord disease*.mp. or spinal cord injur*.mp. or spinal cord lesion*.mp. or spinal neuropath*.mp. or spinal cord neuropath*.mp. or Paresis/ or Paralysis/ or paraly*.mp. or paraplegi*.mp. or parapare*.mp or quadriplegi*.mp. or quadripara*.mp. or tetraplegi*.mp. or tetrapare*.mp. or Urinary bladder, neurogenic/ or neurogenic bladder*.mp.
2. Nephrolithiasis/ or Urolithiasis/ or Ureterolithiasis/ or nephrolith*.mp. or urolith*.mp. or ureterolith*.mp. or cystolith*.mp. or Kidney calculi/ or Staghorn calculi/ or Urinary calculi/ or Urinary bladder calculi/ or Ureteral calculi/ or kidney calcul*.mp. or renal calcul*.mp. or urinary calcul*.mp. or ureteral calcul*.mp. or ureteric calcul*.mp. or staghorn calcul*.mp. or bladder calcul*.mp. or vesical calcul*.mp. or kidney stone*.mp. or renal stone*.mp. or urinary stone*.mp. or ureteral stone*.mp. or ureteric stone*.mp. or bladder stone*.mp. or vesical stone*.mp. or staghorn stone*.mp. or stone disease*.mp. or kidney stone disease*.mp. or urinary stone disease*.mp.
3. 1 and 2

Embase:

1. Spinal cord diseases/ or Spinal cord injuries/ or spinal cord disease*.mp. or spinal cord injur*.mp. or spinal cord lesion*.mp. or spinal neuropath*.mp. or spinal cord neuropath*.mp. or Paresis/ or Paralysis/ or paraly*.mp. or paraplegi*.mp. or parapare*.mp or quadriplegi*.mp. or quadripara*.mp. or tetraplegi*.mp. or tetrapare*.mp. or Neurogenic bladder/ or neurogenic bladder*.mp.
2. Nephrolithiasis/ or Urolithiasis/ or Ureter stone/ or nephrolith*.mp. or urolith*.mp. or ureterolith*.mp. or cystolith*.mp. or Staghorn stone/ or Bladder stone/ or kidney calcul*.mp. or renal calcul*.mp. or urinary calcul*.mp. or ureteral calcul*.mp. or ureteric calcul*.mp. or staghorn calcul*.mp. or bladder calcul*.mp. or vesical calcul*.mp. or kidney stone*.mp. or renal stone*.mp. or urinary stone*.mp. or ureteral stone*.mp. or ureteric stone*.mp. or bladder stone*.mp. or vesical stone*.mp. or staghorn stone*.mp. or Stone disease/ or stone disease*.mp. or kidney stone disease*.mp. or urinary stone disease*.mp.
3. 1 and 2

Cochrane Central Register of Controlled Trials (CENTRAL):

1. Spinal cord diseases [MeSH]
2. Spinal cord injuries [MeSH]
3. Spinal cord disease*
4. Spinal cord injur*
5. Spinal cord lesion*
6. Spinal neuropath*
7. Spinal cord neuropath*
8. Paresis [MeSH]
9. Paralysis [MeSH]
10. Paraly*
11. Paraplegi*
12. Parapare*
13. Quadriplegi*
14. Quadripare*
15. Tetraplegi*
16. Tetrapare*
17. Urinary bladder, neurogenic [MeSH]
18. Neurogenic bladder*
19. Nephrolithiasis [MeSH]
20. Urolithiasis [MeSH]
21. Ureterolithiasis [MeSH]
22. Urolith*
23. Nephrolith*
24. Ureterolith*
25. Cystolith*
26. Kidney calculi [MeSH]
27. Staghorn calculi [MeSH]
28. Urinary calculi [MeSH]
29. Urinary bladder calculi [MeSH]
30. Ureteral calculi [MeSH]
31. Kidney calcul*
32. Renal calcul*
33. Urinary calcul*
34. Ureteral calcul*
35. Ureteric calcul*
36. Staghorn calcul*
37. Bladder calcul*
38. Vesical calcul*
39. Kidney stone*
40. Renal stone*
41. Urinary stone*
42. Ureteral stone*
43. Ureteric stone*
44. Bladder stone*
45. Vesical stone*
46. Staghorn stone*
47. Stone disease*
48. Kidney stone disease*
49. Urinary stone disease*
50. #1 or #2 or #3 or #4 or #5 or #6 or #7 or #8 or #9 or #10 or #11 or #12 or #13 or #14 or #15 or #16
51. #17 or #18 or #19 or #20 or #21 or #22 or #23 or #24 or #25 or #26 or #27 or #28 or #29 or #30 or #31 or #32 or #33 or #34 or #35 or #36 or #37 or #38 or #39 or #40 or #41 or #42 or #43 or #44 or #45 or #46 or #47 or #48 or #49
52. #50 and #51

Web of Science:

1. TS=(spinal cord disease* or spinal cord injur* or spinal cord lesion* or spinal cord neuropath* or spinal neuropath* or paraly* or paraplegi* or parapare* or quadriplegi* or quadripare* or tetraplegi* or tetrapare* or neurogenic bladder)
2. TS=(nephrolith* or urolith* or ureterolith* or cystolith* or kidney calcul* or renal calcul* or urinary calcul* or ureteral calcul* or ureteric calcul* or vesical calcul* or bladder calcul* or staghorn calcul* or kidney stone* or renal stone* or urinary stone* or ureteral stone* or ureteric stone* or bladder stone* or vesical stone* or staghorn stone* or stone disease* or kidney stone disease* or urinary stone disease*)
3. TS=(pcnl or percutaneous nephrolithotomy or nephrolitho* or ureteroscop* or nephrolithotrisy or retrograde surg* or retrograde intrarenal surg* or endourolog* or lithotripsy or litholapax* or cystolitholapax* or chemoly* or eswl or eswt or extracorporeal shockwave lithotripsy or extracorporeal shockwave therap* or extracorporeal lithotripsy or ureteric stent*)
4. #2 or #3
5. #1 and #4
